# Supplementary material for: CCND1-associated ceRNA network reveal the critical pathway of TPRG1-AS1-hsa-miR-363-3p-MYO1B as a prognostic marker for head and neck squamous cell carcinoma
Source: PubMed Central journal article supplement (PMC10363142; doi:10.1038/s41598-023-38847-7), 2023-07-22
Supplement: 41598_2023_38847_MOESM1_ESM.pdf [file 41598_2023_38847_MOESM1_ESM.pdf]

CCND1-associated ceRNA network reveal the critical pathway of TPRG1-AS1-hsa-miR-363-3p-MYO1B as a prognostic marker for head and neck squamous cell carcinoma

Zehao Li<sup>1</sup>, Xinguang Qiu<sup>2\*</sup>, Qi He<sup>2</sup>, Xinghao Fu<sup>2</sup>, Feihong Ji<sup>2</sup>, Xiufen Tian<sup>1</sup>

<sup>1</sup>Department of Pharyngology Head and Neck Surgery, The First Affiliated Hospital of Zhengzhou University, Zhengzhou City, Henan Province, China

<sup>2</sup>Department of Thyroid Surgery, The First Affiliated Hospital of Zhengzhou University, Zhengzhou, Henan Province, China

\* Correspondence:

Corresponding Author

[qxg0914@126.com](mailto:qxg0914@126.com)

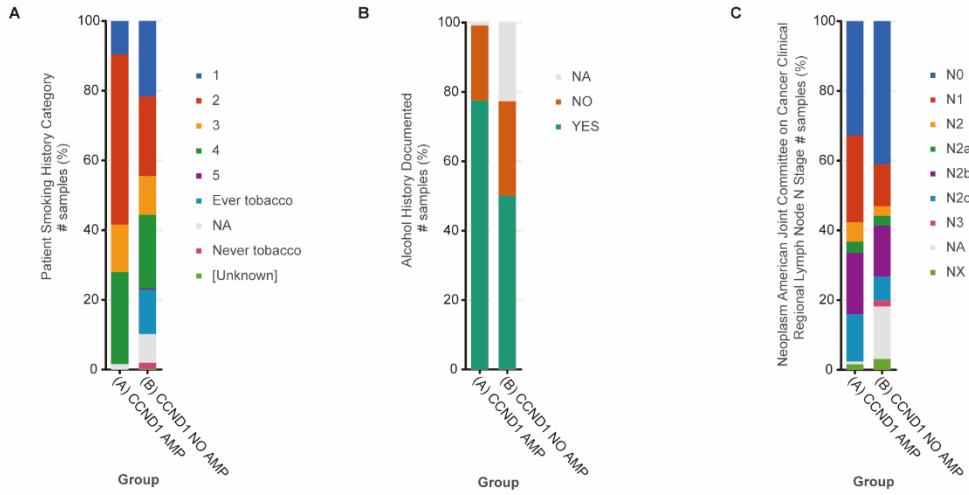

Figure S1: A. Smoking status of HNSC patients in the CCND1 amplification group versus HNSC patients in the no-amplification group in the cBioPortal database. B. Alcohol consumption in HNSC patients in the CCND1 amplification group versus HNSC patients in the no-amplification group in the cBioPortal database. C. Cervical lymph node metastasis in HNSC patients in the CCND1 amplification group versus HNSC patients in the no-amplification group in the cBioPortal database.

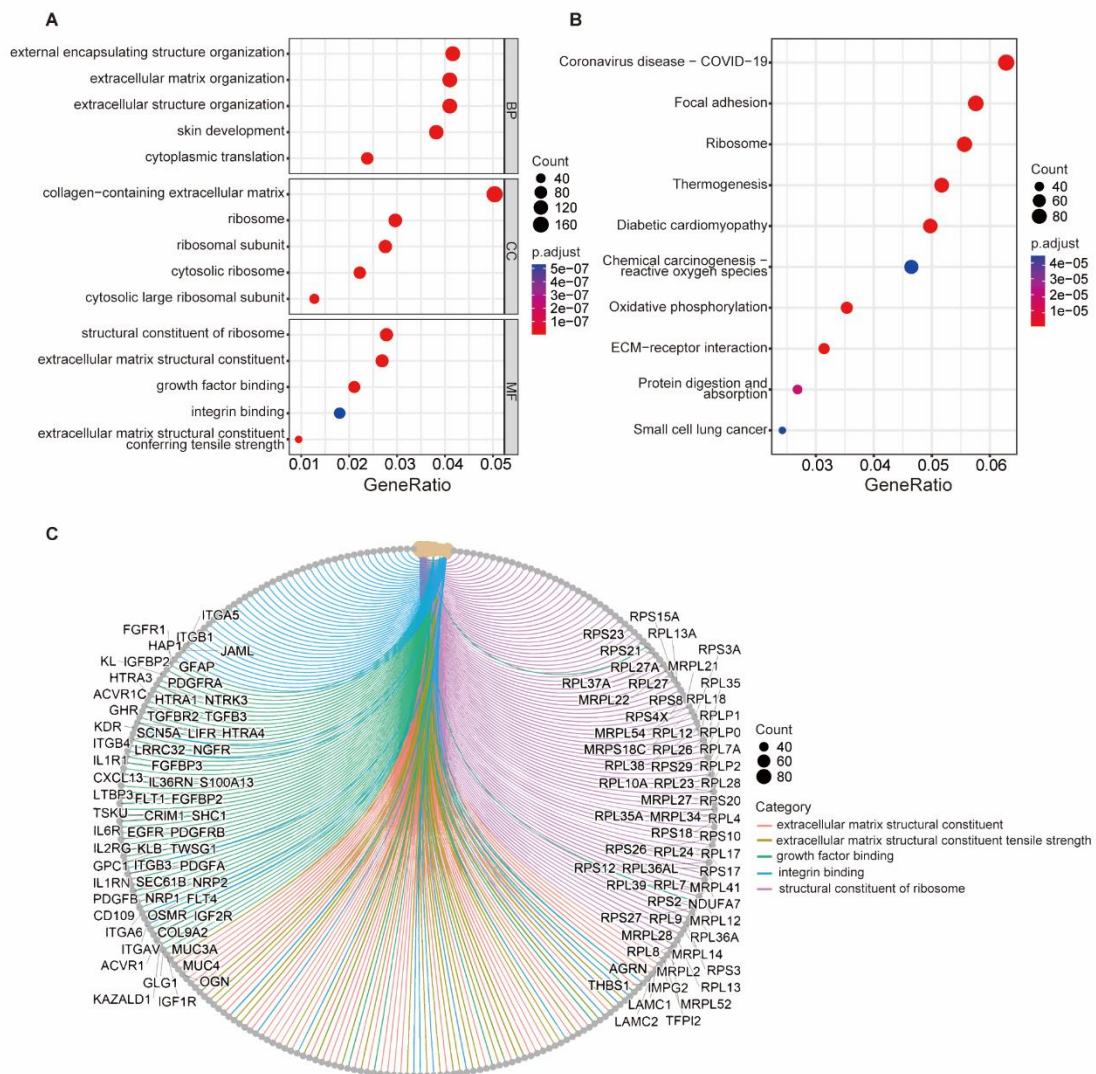

Figure S2: A. GO enrichment analysis of DEmRNAs. B. KEGG enrichment analysis of DEmRNAs. C. GO enrichment analysis of DEmRNAs for 5 related functions' genes

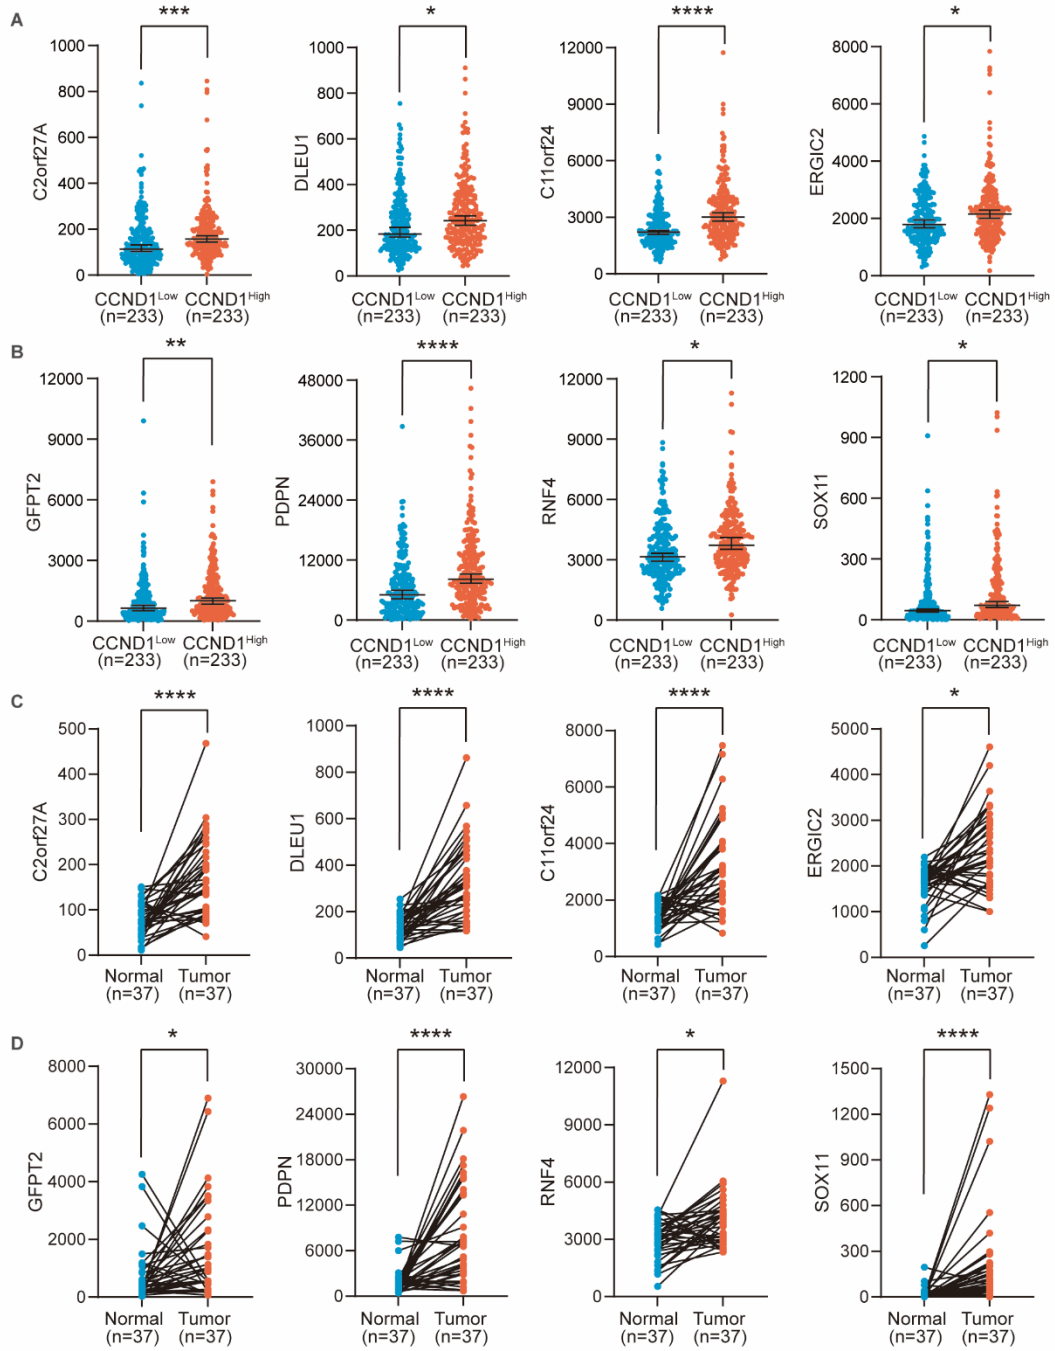

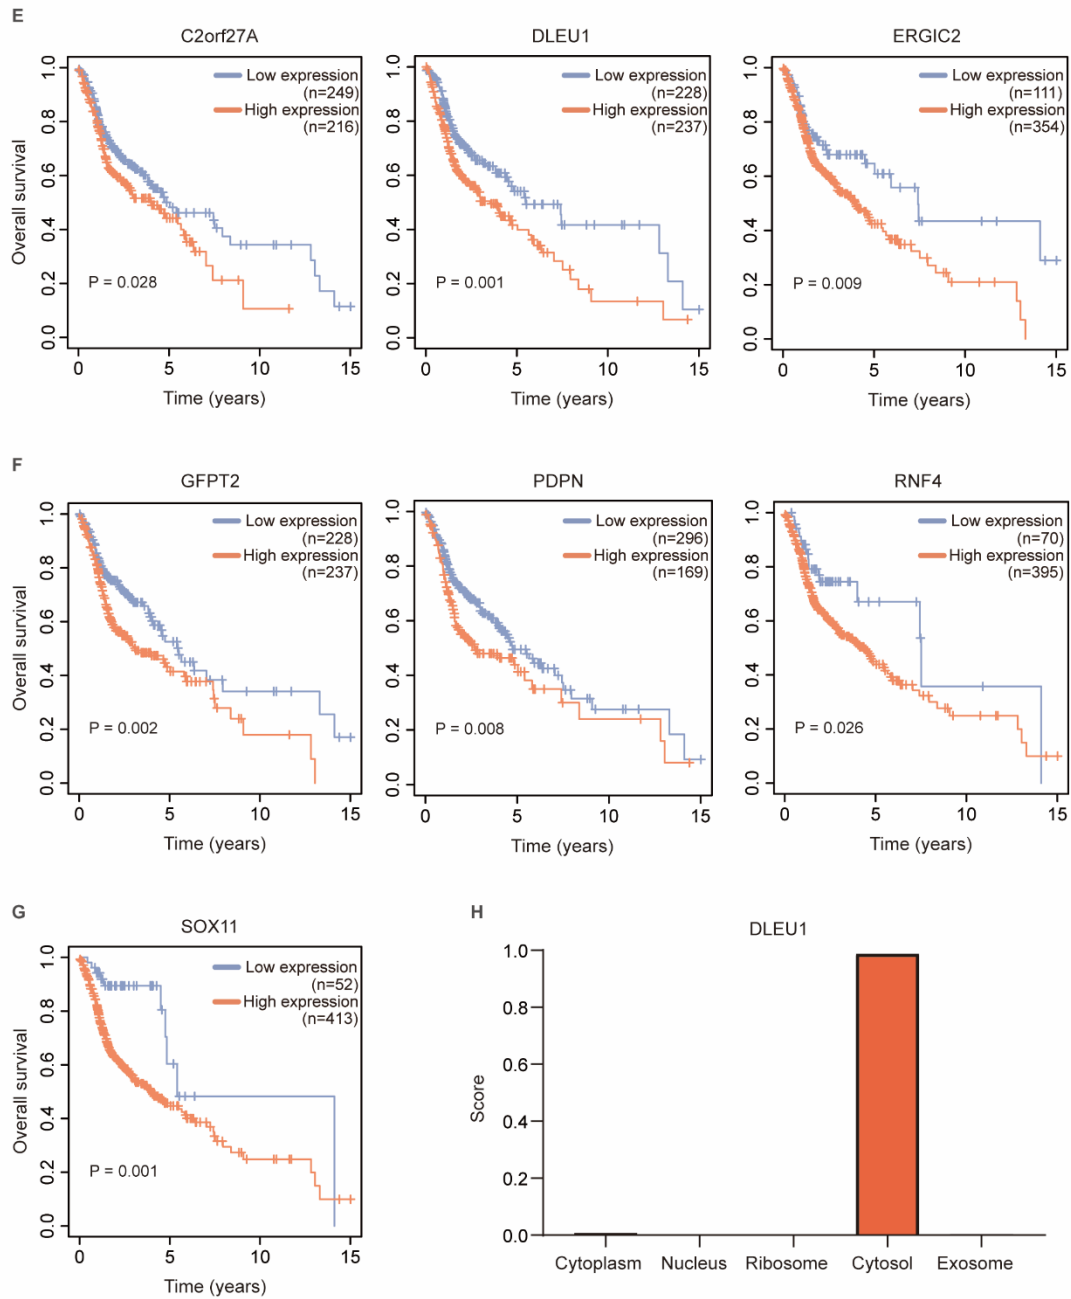

Figure S3: Expression level of DERNAs in CCND1<sup>low</sup> expression group and CCND1<sup>high</sup> expression group. (A) DEIncRNA: C2orf27A, DLEU1. DEmRNA: C11orf24, ERGIC2 (B) DEmRNA: GFPT2, PDPN, RNF4, SOX11. Pairing of gene expression patterns between tumor tissue and normal tissue in patients with HNSC. (C) DEIncRNA: C2orf27A, DLEU1. DEmRNA: C11orf24, ERGIC2 (D) DEmRNA: GFPT2, PDPN, RNF4, SOX11. \* $p < 0.05$ , \*\* $p < 0.01$ , \*\*\* $p < 0.001$ , \*\*\*\* $p < 0.0001$ . (E) Overall survival: C2orf27A, DLEU1, ERGIC2. (F) Overall survival: GFPT2, PDPN, RNF4. (G) Overall survival: SOX11. (H) Subcellular localization of DLEU1.



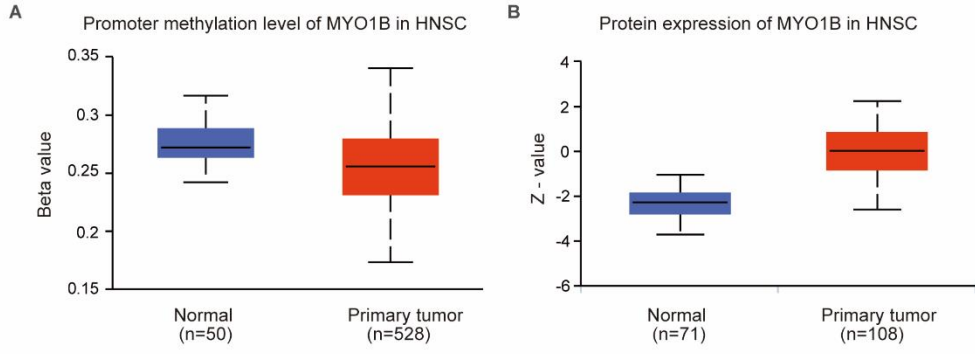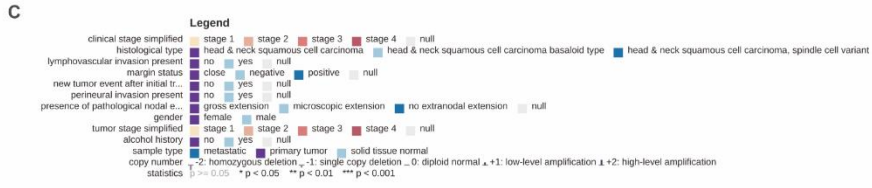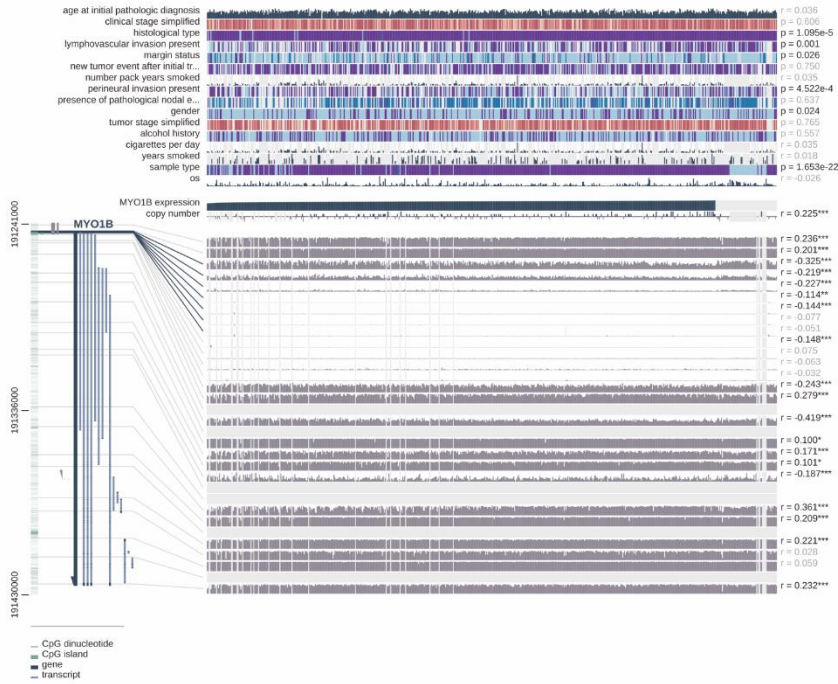

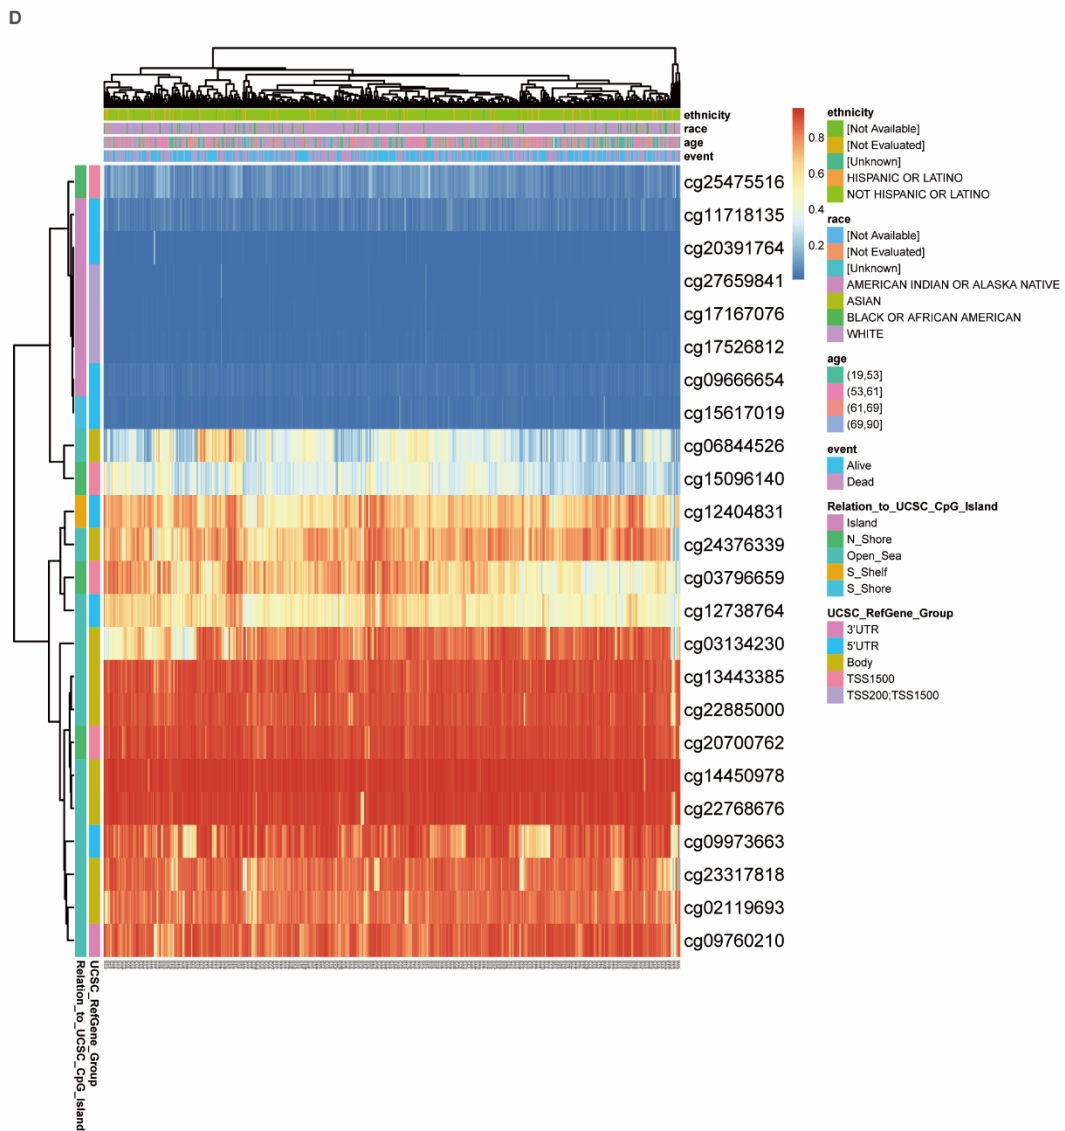

Figure S5: A. Methylation levels of MYO1B in HNSC. B. Protein expression of MYO1B in HNSC. C. Relationship between methylation sites and expression of MYO1B. D. Distribution of different methylation regions related to MYO1B



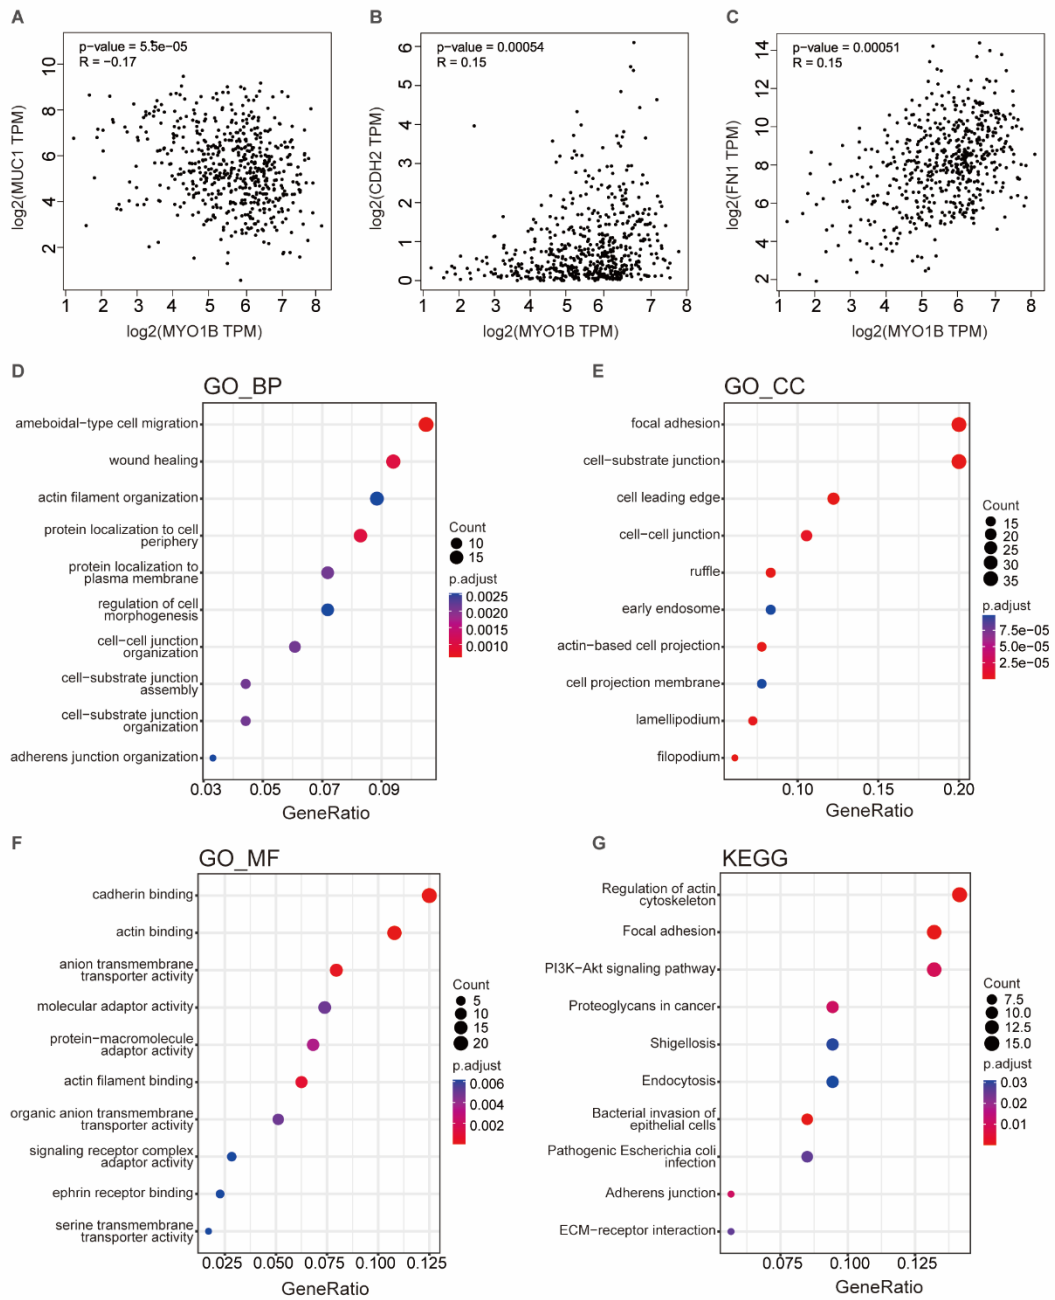

Figure S6: The expressions of MYO1B were associated with EMT makers (A) MUC1, (B) CDH2, (C) FN1. Enrichment analysis of MYO1B (D-G)

| Description         | Gene markers   | HNSC-MYO1B  |          |
|---------------------|----------------|-------------|----------|
|                     |                | correlation | Pvalue   |
| CD8+T cell          | CD8A           | -0.12319    | 0.004822 |
|                     | CD8B           | -0.20854    | 1.54E-06 |
| T cell              | CD3D           | -0.20293    | 2.95E-06 |
|                     | CD3E           | -0.13358    | 0.002225 |
|                     | CD2            | -0.15254    | 0.00047  |
| B cell              | CD19           | -0.27796    | 1.03E-10 |
|                     | CD79A          | -0.27203    | 2.62E-10 |
| Monocyte            | CD86           | 0.152252    | 0.000482 |
|                     | CD115(CSF1R)   | 0.067013    | 0.126233 |
| TAM                 | CCL2           | 0.041468    | 0.344364 |
|                     | CD68           | 0.164391    | 0.000162 |
|                     | IL10           | 0.17749     | 4.55E-05 |
| M1 Macrophage       | INOS(NOS2)     | -0.25476    | 3.54E-09 |
|                     | IRF5           | -0.19534    | 6.93E-06 |
|                     | COX2(PTGS2)    | 0.207923    | 1.65E-06 |
| M2 Macrophage       | CD163          | 0.116028    | 0.007965 |
|                     | VSIG4          | 0.07562     | 0.084339 |
|                     | MS4A4A         | 0.054135    | 0.216913 |
| Neutrophils         | CD66b(CEACAM8) | -0.20892    | 1.47E-06 |
|                     | CD11b(ITGAM)   | -0.08721    | 0.04642  |
|                     | CCR7           | -0.15346    | 0.000434 |
| Natural Killer cell | KIR2DL1        | -0.01247    | 0.776283 |
|                     | KIR2DL3        | -0.08083    | 0.064978 |
|                     | KIR2DL4        | -0.01864    | 0.67085  |
|                     | KIR3DL1        | -0.14488    | 0.000901 |
|                     | KIR3DL2        | -0.10606    | 0.015345 |
|                     | KIR3DL3        | -0.0838     | 0.055689 |
|                     | KIR3DS4        | -0.06063    | 0.166625 |
| Dendritic cell      | HLA-DPB1       | -0.11142    | 0.010853 |
|                     | HLA-DQB1       | -0.06576    | 0.133485 |
|                     | HLA-DRA        | -0.02868    | 0.513213 |
|                     | HLA-DPA1       | -0.03195    | 0.466375 |
|                     | BDCA-1(CD1C)   | -0.08503    | 0.052187 |
|                     | BDCA-4(NRP1)   | 0.377634    | 3.88E-19 |
|                     | CD11c(ITGAX)   | -0.01675    | 0.702671 |

| Description        | Gene markers         | HNSC-MYO1B  |          |
|--------------------|----------------------|-------------|----------|
|                    |                      | correlation | Pvalue   |
| Th1                | T-bet(TBX21)         | -0.15208    | 0.000489 |
|                    | STAT4                | 0.141827    | 0.001158 |
|                    | STAT1                | 0.337295    | 2.35E-15 |
|                    | IFN- $\gamma$ (IFNG) | -0.07691    | 0.07916  |
|                    | TNF- $\alpha$ (TNF)  | 0.195449    | 6.85E-06 |
| Th2                | GATA3                | 0.03441     | 0.432727 |
|                    | STAT6                | 0.137826    | 0.001597 |
|                    | STAT5A               | -0.10372    | 0.017766 |
|                    | IL13                 | -0.05288    | 0.227744 |
| Tfh                | BCL6                 | -0.16356    | 0.000175 |
|                    | IL21                 | -0.05701    | 0.193446 |
| Th17               | STAT3                | 0.104317    | 0.017118 |
|                    | IL17A                | -0.07912    | 0.070876 |
| Treg               | FOXP3                | 0.038963    | 0.374319 |
|                    | CCR8                 | 0.150401    | 0.000565 |
|                    | STAT5B               | 0.140201    | 0.001321 |
|                    | TGF $\beta$ (TGFB1)  | 0.513441    | 1.89E-36 |
| T cell exhaustiion | PD-1(PDCD1)          | -0.14815    | 0.000685 |
|                    | CTLA4                | -0.03779    | 0.388933 |
|                    | LAG3                 | -0.05602    | 0.201297 |
|                    | TIM-3                | 0.026495    | 0.545847 |
|                    | GZMB(HAVCR2)         | -0.06728    | 0.124717 |

Table S1: TIMER database query for correlation of MYO1B genes with 16 markers of immune cells infiltrating tumors.

Sequences of gene-specific primers used for real-time RT-qPCR

| <b>Gene</b> | <b>Forward primer (5'-3')</b> | <b>Reverse primer (5'-3')</b> |
|-------------|-------------------------------|-------------------------------|
| TPRG1-AS1   | TCAAAAGGCCTTGATCCCGA          | AAGGACTCTGCTTCATGGGTG         |
| MYO1B       | GCTCTGGTGTGGAGGTCCTA          | CGTTGCTTCCTCAGGTCTTC          |
| miR-363-3p  | AATTGCACGGTATCCATCTGTA        | CTCAACTGGTGTGTCGTGGA          |
| GAPDH       | GTCTCCTCTGACTTCAACAGCG        | ACCACCCTGTTGCTGTAGCCAA        |
| U6          | CTCGCTTCGGCAGCACA             | AACGCTTCACGAATTTGCGT          |

Table S2: Sequences of gene-specific primers used for real-time RT-qPCR
